# Supplementary material
Source: PubMed Central journal article supplement (PMC3121866)
Supplement: 1104144108_pnas.1104144108_SI.pdf [file 1104144108_pnas.1104144108_SI.pdf]

# Supporting Information

Semenova et al. 10.1073/pnas.1104144108

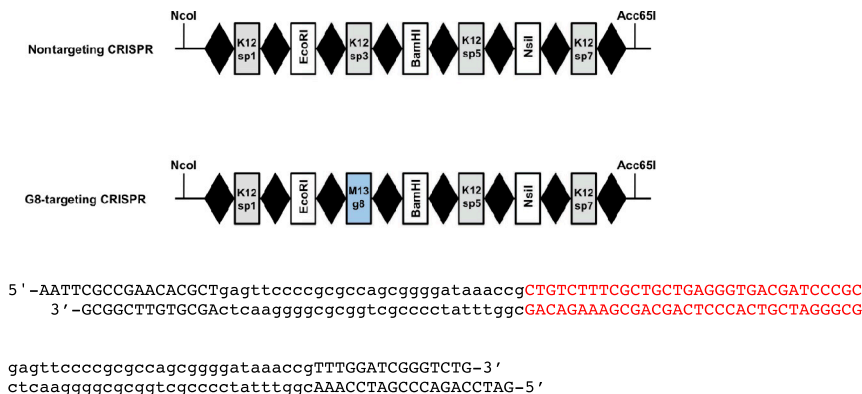

**Fig. S1.** Design of nontargeting CRISPR (clustered regularly interspaced short palindromic repeats) (pWUR477, 57) and M13 g8-targeting CRISPR cassettes; rectangles indicate spacers, rhombi—repeats. Below synthetic DNA used for generating M13 phage matching CRISPR cassette plasmid is shown. Two oligonucleotides were annealed to create double-stranded DNA with sticky EcoRI and BamHI ends. The g8 spacer is shown in red color, repeat sequences are shown in lowercase.

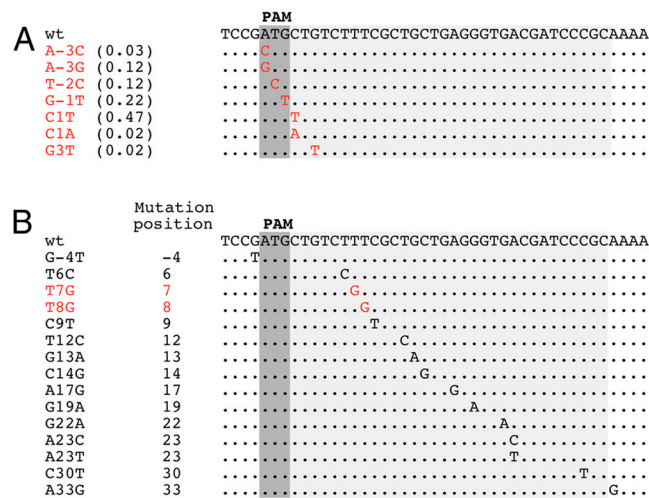

**Fig. S2.** (A) Natural M13 escape mutants obtained on lawns of cells expressing g8 crRNA. The wild-type sequence is shown (Top). Individual mutations are indicated by red-color font. Numbers indicate frequencies of individual mutations (a total of 50 escape mutant phages was sequenced). (B) Engineered point mutations in g8 protospacer, which were not included in Fig. 1B. Mutations indicated with red color led to escape, whereas mutations shown in black were restricted by CRISPR/Cas (the phage mutants had nonescape phenotype on lawns of cells expressing the g8 crRNA). PAM, protospacer-adjacent motif.

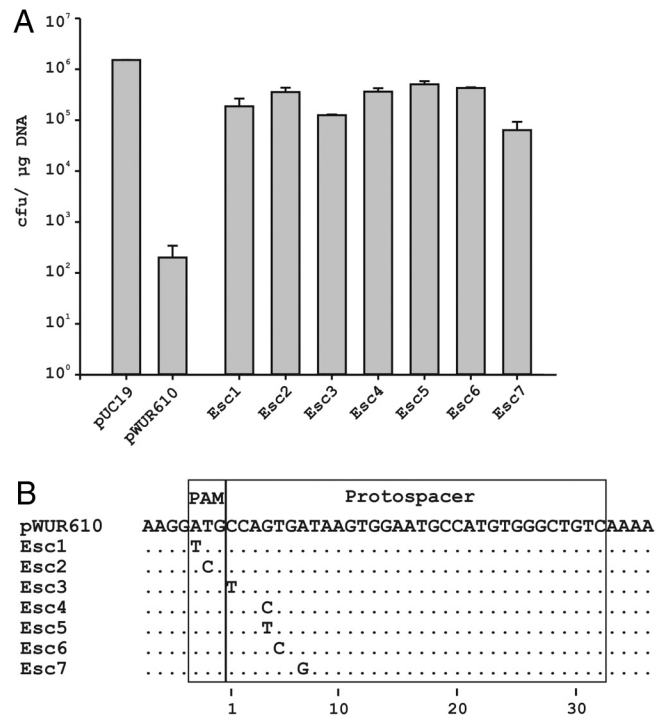

**Fig. 53.** Mutations in PAM and protospacer seed region abolish CRISPR/Cas mediated plasmid transformation inhibition. (A) Transformation efficiencies of pUC19, pWUR610, and pWUR610 escape mutant series. pWUR610 is a pUC19 plasmid containing the J3 protospacer on a 350-bp fragment of bacteriophage  $\lambda$  genome (Table S1). The *recA*<sup>-</sup> strain *Escherichia coli* KRX (Promega) was used to overproduce Cascade, Cas3, and J3 crRNA. Error bars indicate the standard deviation. (B) Overview of the identified escape mutants. The sequence of the protospacer as well as escape point mutations are shown.

| Mutation positions |        | PAM     | Protospacer                          |
|--------------------|--------|---------|--------------------------------------|
| wt                 |        | TCCGATG | CTGCTTTTCGCTGCTGAGGGTGACGATCCC GAAAA |
| G-4C, C1T          | -4, 1  | C       | T                                    |
| G-4T, C1T          | -4, 1  | T       | T                                    |
| T6A, G-1T          | 6, -1  | T       | A                                    |
| T6C, C1T           | 6, 1   | T       | C                                    |
| C9T, A-3G          | 9, -3  | G       | T                                    |
| C9T, C1T           | 9, 1   | T       | T                                    |
| T12A, C1T          | 12, 1  | T       | A                                    |
| T12C, C1T          | 12, 1  | T       | C                                    |
| T15A, T-2C         | 15, -2 | C       | A                                    |
| T15A, G-1C         | 15, -1 | C       | A                                    |
| G18A, T-2C         | 18, -2 | C       | A                                    |
| G18A, A-3C         | 18, -3 | C       | A                                    |
| T21C, T-2C         | 21, -2 | C       | C                                    |
| T21C, A-3G         | 21, -3 | G       | C                                    |
| C24T, G-1T         | 24, -1 | T       | T                                    |
| C24T, C1T          | 24, 1  | T       | T                                    |
| T27C, A-3C         | 27, -3 | C       | C                                    |
| C30T, G3T          | 30, 3  | T       | T                                    |
| A33C, C1T          | 33, 1  | T       | C                                    |
| A33G, G-1T         | 33, -1 | T       | G                                    |

**Fig. 54.** Escape mutants obtained on lawns of cells expressing g8 crRNA with individual nonescape phages carrying point mutations in the g8 protospacer. Each row indicates a nonrestricted point mutant of M13, with mutational substitution indicated with black font color. In red, substitutions observed in phages that escaped the block imposed by cells expressing the g8 crRNA are shown.



|              | <b>PAM</b>                                   |
|--------------|----------------------------------------------|
| WT           | TCCGATGCTGTCCTTTCGCTGCTGAGGGTGACGATCCCGCAAAA |
| G-4C         | ...C.....                                    |
| A-3G         | ...G.....                                    |
| G-1T         | ...T.....                                    |
| C1T          | ...T.....                                    |
| G3A          | ...A.....                                    |
| T6A          | .....A.....                                  |
| C9T          | .....T.....                                  |
| T12A         | .....A.....                                  |
| T15A         | .....A.....                                  |
| G18A         | .....A.....                                  |
| G19C         | .....C.....                                  |
| T21C         | .....C.....                                  |
| G22A         | .....A.....                                  |
| G22C         | .....C.....                                  |
| A23T         | .....T.....                                  |
| A23G         | .....G.....                                  |
| C24T         | .....T.....                                  |
| T27C         | .....C.....                                  |
| G10T, C30A   | .....T.....A.....                            |
| C14G, C30A   | .....G.....A.....                            |
| Mut9-11_1    | ...C..T.....A.....                           |
| Mut18-20_1   | ...C.....A.....A.....                        |
| Mut27-30_5   | .....CA.A.....                               |
| Mut18-20_7   | ...C.....AA.....A.....                       |
| Mut27-30_6_4 | ...C.....CG.A.....                           |
| Mut18-20_5   | ...C.....ACC.....A.....                      |
| Mut27-30_6_3 | ...C.....CGAA.....                           |

**Fig. S7.** Phenotypes of indicated phages on lawns of *hns*<sup>-</sup> *E. coli* cells containing an engineered g8 CRISPR spacer in their chromosomal CRISPR cassette. See Fig. 1 legend for nomenclature.

| Probe pair    | Position (mutation) | Phenotype | Kd (nM)      | EMSA gel                                                                             |
|---------------|---------------------|-----------|--------------|--------------------------------------------------------------------------------------|
| BG3233+BG3234 | wild type           |           | $24 \pm 9$   | 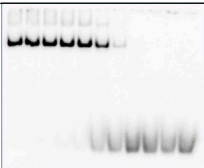   |
| BG3333+BG3334 | -4 (G→C)            | nonescape | $31 \pm 7$   |    |
| BG3235+BG3236 | -3 (A→C)            | escape    | $285 \pm 32$ |    |
| BG3237+BG3238 | -2 (T→C)            | escape    | $> 1,230$    |    |
| BG3239+BG3240 | -1 (G→T)            | escape    | $> 1,230$    |   |
| BG3241+BG3242 | 1 (C→T)             | escape    | $> 1,230$    |  |

|               |         |           |           |                                                                                      |
|---------------|---------|-----------|-----------|--------------------------------------------------------------------------------------|
| BG3243+BG3244 | 2 (T→A) | escape    | 270 ± 20  | 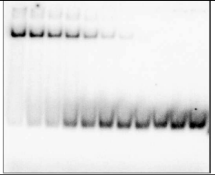   |
| BG3245+BG3246 | 3 (G→T) | escape    | 790 ± 254 |    |
| BG3247+BG3248 | 4 (T→G) | escape    | > 1,230   |    |
| BG3249+BG3250 | 5 (C→G) | escape    | 782 ± 132 |    |
| BG3251+BG3252 | 6 (T→A) | nonescape | 38 ± 14   |   |
| BG3253+BG3254 | 7 (T→C) | escape    | > 1,230   |  |

|                 |          |           |                |                                                                                      |
|-----------------|----------|-----------|----------------|--------------------------------------------------------------------------------------|
| BG33255+BG3256  | 8 (T→C)  | escape    | $1176 \pm 112$ | 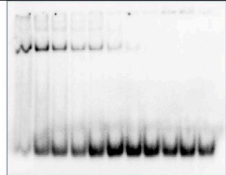   |
| BG33331+BG3332  | 9 (C→T)  | nonescape | $38 \pm 11$    |    |
| BG33365+BG33366 | 10 (G→T) | nonescape | $310 \pm 28$   |    |
| BG33367+BG33368 | 15 (T→A) | nonescape | $439 \pm 43$   |    |
| BG33369+BG33370 | 24 (C→T) | nonescape | $45 \pm 20$    |   |
| BG33371+BG33372 | 30 (C→A) | nonescape | $29 \pm 8$     |  |

**Fig. S8.** Electrophoretic mobility shift assays of Cascade complex binding various double-stranded DNA probes. The probes are listed in Table S2. Cascade concentration range (nM): 1200, 600, 300, 150, 75, 37.5, 18.8, 9.4, 4.7, 2.3, 1.2, respectively.

**Table S1. Plasmids used in this study**

| Plasmids | Description and order of genes (5'-3')                                  | Restriction sites | Primers         | Source            |
|----------|-------------------------------------------------------------------------|-------------------|-----------------|-------------------|
| pWUR477  | nontargeting CRISPR in pACYCDuet-1                                      |                   |                 | Brouns et al. (1) |
| pWUR397  | <i>cas3</i> in pRSF-1b, no tags                                         |                   |                 | Brouns et al. (1) |
| pWUR399  | <i>casA-casB-casC-casD-casE-cas1-cas2</i> in pCDF-1b, no tags           |                   |                 | Brouns et al. (1) |
| pWUR400  | <i>casA-casB-casC-casD-casE</i> in pCDF-1b, no tags                     |                   |                 | Brouns et al. (1) |
| pWUR408  | <i>casA</i> in pRSF-1b, no tags                                         |                   |                 | Brouns et al. (1) |
| pWUR514  | <i>casB</i> with Strep-tag II (N-term)- <i>casC-casD-CasE</i> in pET52b |                   |                 | Jore et al. (2)   |
| pWUR610  | lambda fragment 17918–18250, in pUC19                                   | BamHI/HindIII     | BG3218 + BG3219 | this study        |
| pWUR615  | <i>E. coli</i> CRISPR, 7 x spacer g8, in pACYCDuet-1*                   | EcoNI/Acc65I      |                 | Geneart, Germany  |
| pWUR630  | <i>E. coli</i> CRISPR, 4 x spacer J3, in pACYCDuet-1†                   | NcoI/KpnI         |                 | Geneart, Germany  |

\*pWUR615—*E. coli* CRISPR, 7x spacer g8 (underlined), in pACYCDuet-1

CCTGCATTAGGTAATACGACTCACTATAGGATAAACCGCTGTCTTCGCTGCTGAGGGTGACGATCCCGCGAGTTCCCCGCGCCAGCGGGGATAAACCG  
CTGTCTTCGCTGCTGAGGGTGACGATCCCGCGAGTTCCCCGCGCCAGCGGGGATAAACCGCTGTCTTCGCTGCTGAGGGTGACGATCCCGCGAGTTC  
 CCCGCGCCAGCGGGGATAAACCGCTGTCTTCGCTGCTGAGGGTGACGATCCCGCGAGTTCCCCGCGCCAGCGGGGATAAACCGCTGTCTTCGCTGCT  
GAGGGTGACGATCCCGCGAGTTCCCCGCGCCAGCGGGGATAAACCGCTGTCTTCGCTGCTGAGGGTGACGATCCCGCGAGTTCCCCGCGCCAGCGGG  
 GATAAACCGCTGTCTTCGCTGCTGAGGGTGACGATCCCGCGAGTTCCCCGCGCCAGCGGGGATAAACCGGGTACC.

†pWUR630—*E. coli* CRISPR, 4x spacer J3 (underlined), in pACYCDuet-1

CCATGGAAACAAAGAATTAGCTGATCTTTAATAATAAGGAAATGTTACATTAAGGTTGGTGGGTTGTTTTATGGGAAAAAATGCTTTAAGAACAAATG  
 TATACTTCTAGAGAGTTCCCCGCGCCAGCGGGGATAAACCGCCAGTGATAAGTGGAATGCCATGTGGGCTGTCGAGTTCCCCGCGCCAGCGGGGATAAACCG  
CCAGTGATAAGTGGAATGCCATGTGGGCTGTCGAGTTCCCCGCGCCAGCGGGGATAAACCGCCAGTGATAAGTGGAATGCCATGTGGGCTGTCGAG  
 TTCCCGCGCCAGCGGGGATAAACCGCCAGTGATAAGTGGAATGCCATGTGGGCTGTCGAGTTCCCCGCGCCAGCGGGGATAAACCGCAGCTCCCATTT  
 CAAACCCAGGTACC.

1. Brouns SJ, et al. (2008) Small CRISPR RNAs guide antiviral defense in prokaryotes. *Science* 321:960–964.
2. Jore MM, et al. (2011) Structural basis for CRISPR RNA-guided DNA recognition by Cascade. *Nat Struct Mol Biol* 18:529–536.



**Table S2. Primers used in this study**

| Experiment              | Primer                         | Sequence (5'-3')                           | Description                        |
|-------------------------|--------------------------------|--------------------------------------------|------------------------------------|
| M13 mutagenesis*        | N-4                            | GCTACCCTGTTCCCHATGTCIGTCITTC               | Mutation at position -4            |
|                         | N2                             | CCTCGTTCGGATGCVGICITTCGGCTG                | Mutation at position 2             |
|                         | N4                             | TCGTTCCGATGCTGVCCTTCCGCTGAG                | Mutation at position 4             |
|                         | N5                             | CGTTCGGATGCTGDTTTCGCTGAGG                  | Mutation at position 5             |
|                         | N6                             | GTTCCGATGCTGCTVTCGCTGAGGG                  | Mutation at position 6             |
|                         | N7                             | TTCCGATGCTGCTVTCGCTGAGGGT                  | Mutation at position 7             |
|                         | N8                             | TCCGATGCTGCTVTCGCTGAGGGTG                  | Mutation at position 8             |
|                         | N9                             | CCGATGCTGCTTTCGCTGAGGGTGA                  | Mutation at position 9             |
|                         | N10                            | CGATGCTGCTTTCGCTGAGGGTGAC                  | Mutation at position 10            |
|                         | N11                            | GATGCTGCTTTCGDTGCTGAGGGTGAC                | Mutation at position 11            |
|                         | N12                            | ATGCTGCTTTCGCTGAGGGTGACGA                  | Mutation at position 12            |
|                         | N13                            | 7GCTGCTTTCGCTHCTGAGGGTGACGAT               | Mutation at position 13            |
|                         | N14                            | GCTGCTTTCGCTGAGGGTGACGATC                  | Mutation at position 14            |
|                         | N15                            | CTGCTTTCGCTGAGGGTGACGATCC                  | Mutation at position 15            |
|                         | N16                            | IGTCTTTCGCTHAGGGTGACGATCCC                 | Mutation at position 16            |
|                         | N17                            | GTCTTTCGCTGAGGGTGACGATCCC                  | Mutation at position 17            |
|                         | N18                            | ICTTTCGCTGAGGGTGACGATCCCCG                 | Mutation at position 18            |
|                         | N19                            | CTTTCGCTGAGGGTGACGATCCCCGCA                | Mutation at position 19            |
|                         | N22                            | ICGCTGCTGAGGGTHAGGATCCGCCAAA               | Mutation at position 22            |
|                         | N23                            | CGCTGCTGAGGGTGBCGATCCGCCAAAAG              | Mutation at position 23            |
|                         | N24                            | GCTGCTGAGGGTGTGATCCGCCAAAAGC               | Mutation at position 24            |
|                         | N27                            | GCTGAGGGTGTGATCCGCCAAAAGCGCC               | Mutation at position 27            |
|                         | N30                            | GAGGGTGACGATCCDGC AAAAGCGGCC               | Mutation at position 30            |
|                         | N33                            | GGTGACGATCCGCCAAAAGCGGCCCTTAA              | Mutation at position 32            |
|                         | N9-11(T6C)                     | CCGATGCTGCTTTCGCTGAGGGTGACG                | Mutation at positions 6, 9-11      |
|                         | N18-20(T6C, C30A)              | TCCTTCGCTGAAAMTGACGATCCAGCAA               | Mutation at positions 6, 18-20, 30 |
|                         | N27-29(C30A)                   | GCAGGGTGACGACMMAGCAAAGCGGCCCT              | Mutation at positions 27-30        |
|                         | N29-32                         | CGCTGCTGAGGGTGACGATDAGTAAAGCGCCCTTAACTC    | Mutation at positions 29-32        |
|                         | N28-32                         | CTTTCGCTGAGGGTGACGATDDBAGTAAAGCGCCCTTAACTC | Mutation at positions 28-32        |
|                         | G8_F                           | CTTTAGTCTCAAAGCCCTG                        | g8 protospacer forward primer      |
|                         | G8_R                           | GCTTGCTTCGAGGTGAAATTC                      | g8 protospacer reverse primer      |
|                         | BG3218                         | GGCCCGGATCCGTCGGCGGCGATGATGCG              | lambda fragment + BamHI (fw)       |
| BG3219                  | CGGCCAAGCTTCATCGGGTTCATCCCGTTT | lambda fragment + HindIII (rv)             |                                    |
| Mutant phage sequencing |                                |                                            |                                    |
| Plasmid construction    |                                |                                            |                                    |
